# Supplementary material
Source: ML conference proceedings conference paper supplement (https://proceedings.neurips.cc/paper_files/paper/2015/hash/b618c3210e934362ac261db280128c22-Abstract.html)
Supplement: Supplementary file [file b618c3210e934362ac261db280128c22-Supplemental.zip]

---

# Supplementary Material: A Recurrent Latent Variable Model for Sequential Data

---

**Junyoung Chung, Kyle Kastner, Laurent Dinh, Kratarth Goel,  
Aaron Courville, Yoshua Bengio\***

Department of Computer Science and Operations Research  
Université de Montréal

\*CIFAR Senior Fellow

{firstname.lastname}@umontreal.ca

## A Derivation of the Variational Lower Bound

The structure of the approximate posterior follows the structure of the prior and allows us to have the following decomposition

$$\begin{aligned}
& \int q(\mathbf{z}_{\leq T} \mid \mathbf{x}_{\leq T}) \log \left( \frac{p(\mathbf{x}_{\leq T}, \mathbf{z}_{\leq T})}{q(\mathbf{z}_{\leq T} \mid \mathbf{x}_{\leq T})} \right) d\mathbf{z}_{\leq T} \\
&= \int \sum_{t=1}^T \left( q(\mathbf{z}_{\leq T} \mid \mathbf{x}_{\leq T}) \log \left( \frac{p(\mathbf{z}_t \mid \mathbf{x}_{< t}, \mathbf{z}_{< t}) p(\mathbf{x}_t \mid \mathbf{z}_{\leq t}, \mathbf{x}_{< t})}{q(\mathbf{z}_t \mid \mathbf{x}_{\leq t}, \mathbf{z}_{< t})} \right) \right) d\mathbf{z}_{\leq T} \\
&= \sum_{t=1}^T \left( \int q(\mathbf{z}_{\leq t} \mid \mathbf{x}_{\leq t}) \log \left( \frac{p(\mathbf{z}_t \mid \mathbf{x}_{< t}, \mathbf{z}_{< t}) p(\mathbf{x}_t \mid \mathbf{z}_{\leq t}, \mathbf{x}_{< t})}{q(\mathbf{z}_t \mid \mathbf{x}_{\leq t}, \mathbf{z}_{< t})} \right) d\mathbf{z}_{\leq t} \right) \\
&= \sum_{t=1}^T \left( \int q(\mathbf{z}_{\leq t} \mid \mathbf{x}_{\leq t}) \log p(\mathbf{x}_t \mid \mathbf{z}_{\leq t}, \mathbf{x}_{< t}) d\mathbf{z}_{\leq t} + \int q(\mathbf{z}_{\leq t} \mid \mathbf{x}_{\leq t}) \log \left( \frac{p(\mathbf{z}_t \mid \mathbf{x}_{< t}, \mathbf{z}_{< t})}{q(\mathbf{z}_t \mid \mathbf{x}_{\leq t}, \mathbf{z}_{< t})} \right) d\mathbf{z}_{\leq t} \right) \\
&= \sum_{t=1}^T \left( \int q(\mathbf{z}_{\leq t} \mid \mathbf{x}_{\leq t}) \log p(\mathbf{x}_t \mid \mathbf{z}_{\leq t}, \mathbf{x}_{< t}) d\mathbf{z}_{\leq t} - \int q(\mathbf{z}_{< t} \mid \mathbf{x}_{< t}) \text{KL}(q(\mathbf{z}_t \mid \mathbf{x}_{\leq t}, \mathbf{z}_{< t}) \parallel p(\mathbf{z}_t \mid \mathbf{x}_{< t}, \mathbf{z}_{< t})) d\mathbf{z}_{< t} \right) \\
&= \mathbb{E}_{\mathbf{z}_{\leq T} \sim q(\mathbf{z}_{\leq T} \mid \mathbf{x}_{\leq T})} \left[ \sum_{t=1}^T \left( -\text{KL}(q(\mathbf{z}_t \mid \mathbf{x}_{\leq t}, \mathbf{z}_{< t}) \parallel p(\mathbf{z}_t \mid \mathbf{x}_{< t}, \mathbf{z}_{< t})) + \log p(\mathbf{x}_t \mid \mathbf{z}_{\leq t}, \mathbf{x}_{< t}) \right) \right] \\
&\simeq \sum_{t=1}^T (\log p(\mathbf{x}_t \mid \mathbf{z}_{\leq t}, \mathbf{x}_{< t}) - \text{KL}(q(\mathbf{z}_t \mid \mathbf{x}_{\leq t}, \mathbf{z}_{< t}) \parallel p(\mathbf{z}_t \mid \mathbf{x}_{< t}, \mathbf{z}_{< t}))) \text{ where } \mathbf{z}_{\leq T} \sim q(\mathbf{z}_{\leq T} \mid \mathbf{x}_{\leq T})
\end{aligned}$$
